# Supplementary material for: Core–shell structured α-Fe2O3@TiO2 nanocomposites with improved photocatalytic activity in the visible light region
Source: Royal Society of Chemistry journal article supplement (doi:10.1039/c3cp53178c), 2013-01-01
Supplement: c3cp53178c.pdf [file c3cp53178c.pdf]

Supporting Information

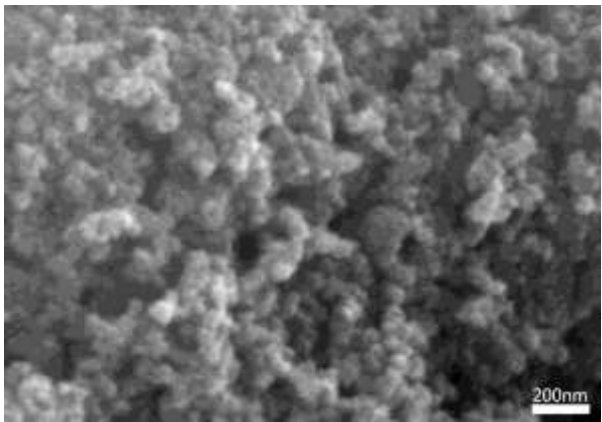

Fig. S1 The FESEM image of Fe<sub>2</sub>O<sub>3</sub>@TiO<sub>2</sub> core-shell nanocomposites with 1M HCl at 100°C for 24h processing.

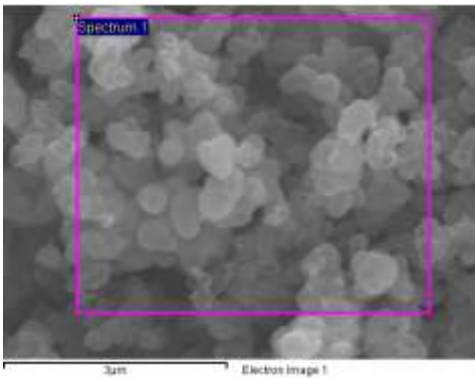

| Element | Weight% | Atomic% |
|---------|---------|---------|
| C K     | 21.89   | 33.89   |
| O K     | 43.10   | 50.10   |
| F K     | 4.49    | 4.39    |
| Ti K    | 26.47   | 10.27   |
| Fe K    | 4.06    | 1.35    |
| Totals  | 100.00  |         |

Fig. S2 The corresponding selected interfacial area and all elements analysis of EDS spectrum for the Fe<sub>2</sub>O<sub>3</sub>@TiO<sub>2</sub> core-shell nanocomposite etched in 0.2 M HCl for 48 h. The molar ratio for Fe<sub>2</sub>O<sub>3</sub>:TiO<sub>2</sub> is about 7.0 % by calculating the atomic percentage of Fe and Ti.

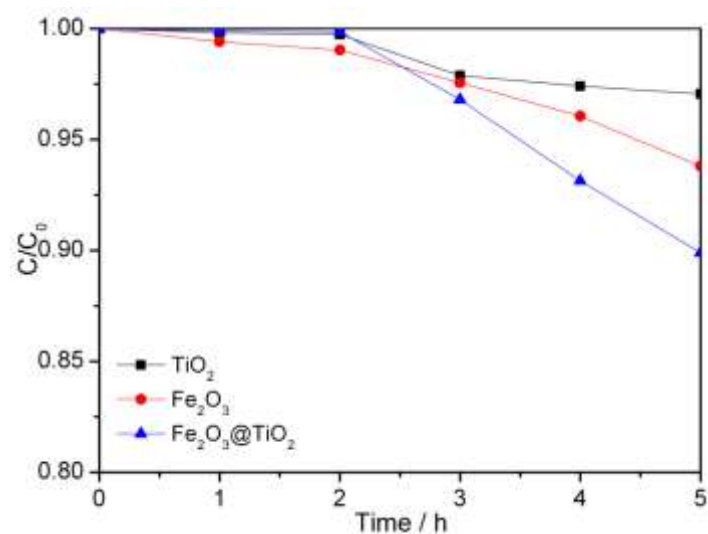

Fig. S3 The performance of TiO<sub>2</sub>, Fe<sub>2</sub>O<sub>3</sub> and Fe<sub>2</sub>O<sub>3</sub>@TiO<sub>2</sub> core-shell nanocomposites for photocatalytic degradation of RhB under the irradiation of visible light.

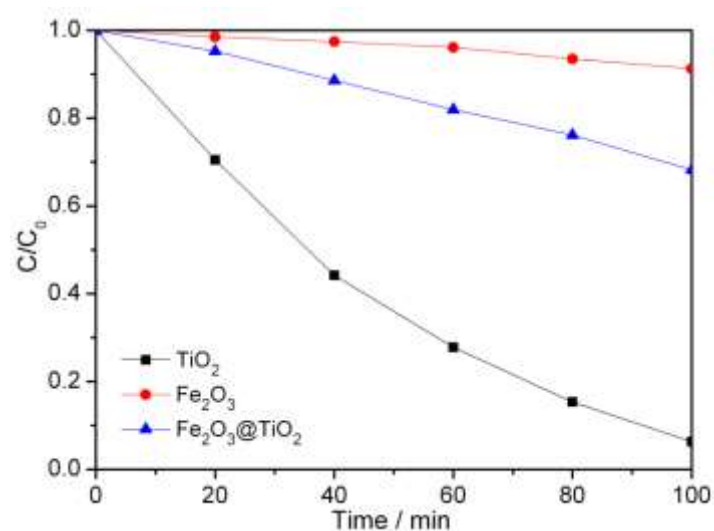

Fig. S4 The performance of TiO<sub>2</sub>, Fe<sub>2</sub>O<sub>3</sub> and Fe<sub>2</sub>O<sub>3</sub>@TiO<sub>2</sub> core-shell nanocomposites for photocatalytic degradation of RhB under the irradiation of UV light.

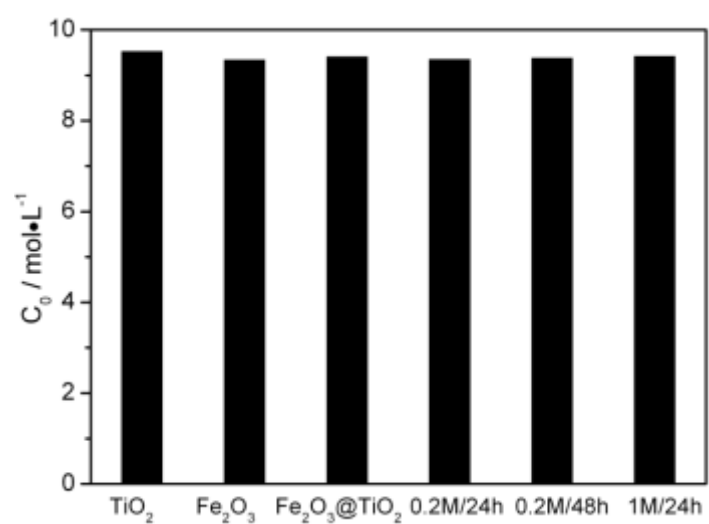

Fig. S5 The residual concentration of RhB after achieving a equilibrium state of adsorption-desorption by photocatalysts for 10 min.
